# Supplementary material for: In-Situ Study of Electrochemical Migration of Tin in The Presence of Bromide Ion
Source: Research Square preprint supplement (doi:10.21203/rs.3.rs-113145/v1), 2020-11-25
Supplement: Supplementary file 1 [file f57eaf884bb8ac7d638a19ac.pdf]

## **Supplementary File**

### **In-situ study of electrochemical migration of tin in the presence of bromide ion**

Ee Lynn Lee<sup>1</sup>, A. S. M. A. Haseeb<sup>1</sup>, Wan Jeffrey Basirun<sup>2</sup>, Yew Hoong Wong<sup>1</sup>, Mohd Faizul Mohd Sabri<sup>1</sup> & Boon Yew Low<sup>3</sup>

<sup>1</sup>Department of Mechanical Engineering, Faculty of Engineering, University of Malaya, Kuala Lumpur 50603, Malaysia.

<sup>2</sup>Department of Chemistry, Faculty of Science, University of Malaya, Kuala Lumpur 50603, Malaysia.

<sup>3</sup>Process Innovation, NXP Semiconductors Malaysia Sdn. Bhd., Selangor, Malaysia.

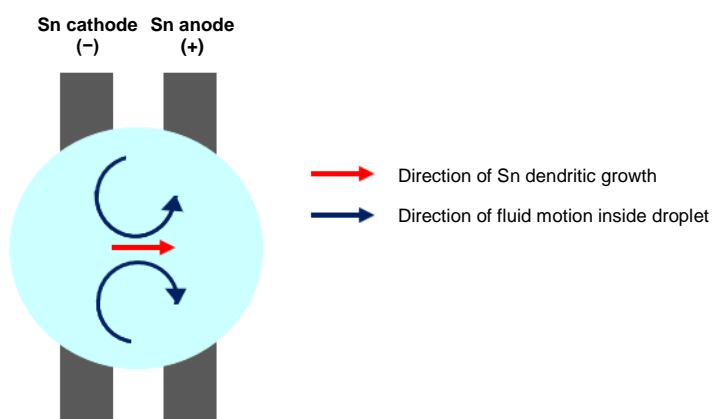

**Supplementary Figure S1.** Schematic of electrolyte flow (top view) when 3 V bias voltage was applied.

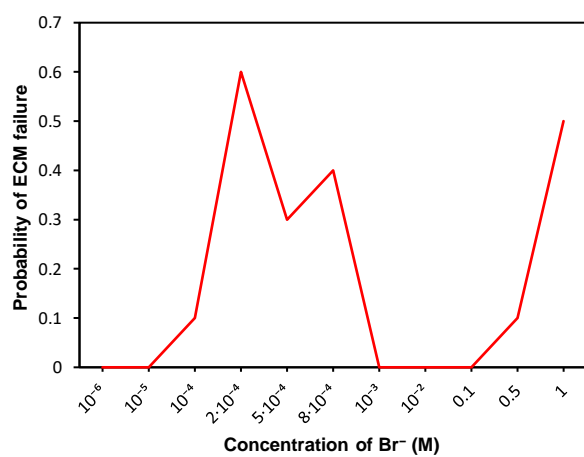

**Supplementary Figure S2.** Probability of short circuit as a function of bromide content.

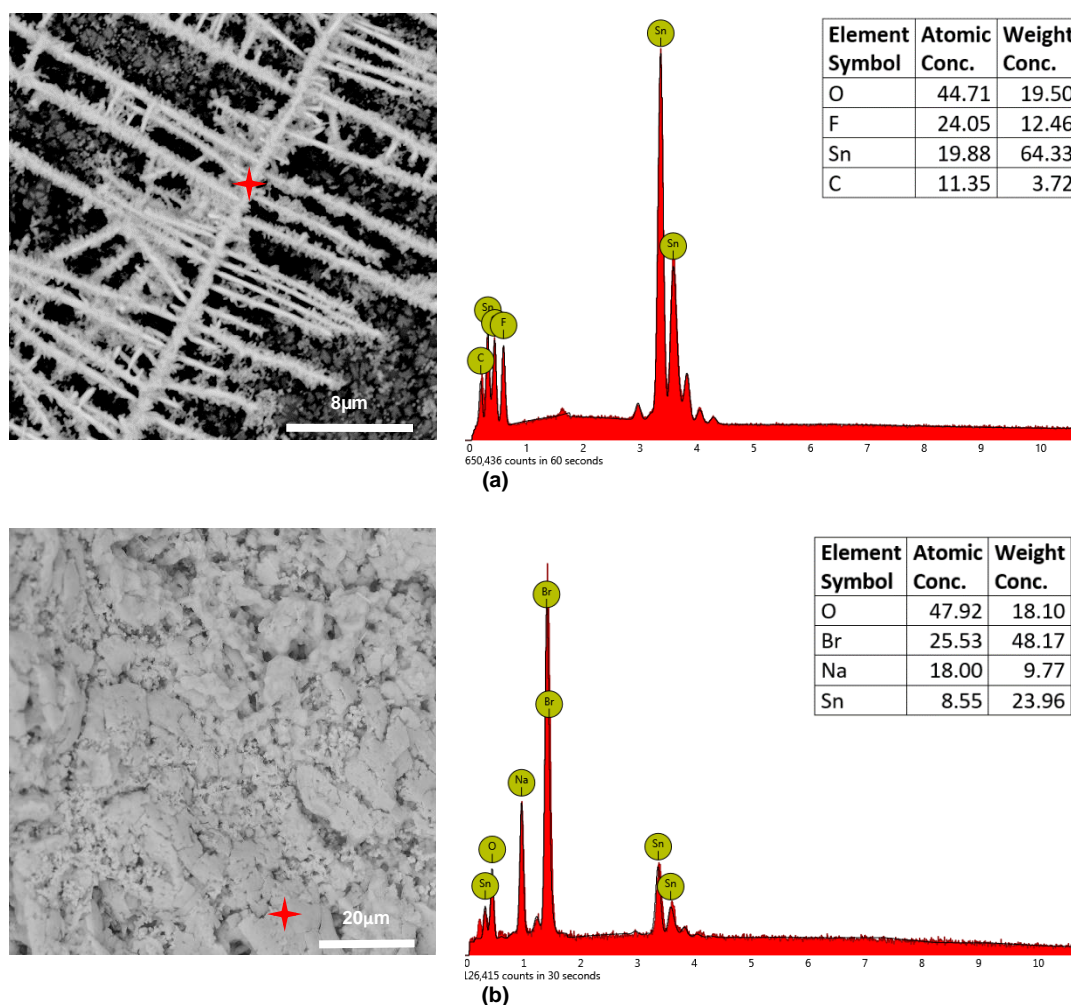

**Supplementary Figure S3.** SEM images of (a) Sn dendrite (in  $2 \cdot 10^{-4}$  M NaBr, 3 V) and its respective EDX spectrum. (b) Precipitate (in 0.5 M NaBr, 3 V) and its respective EDX spectrum.

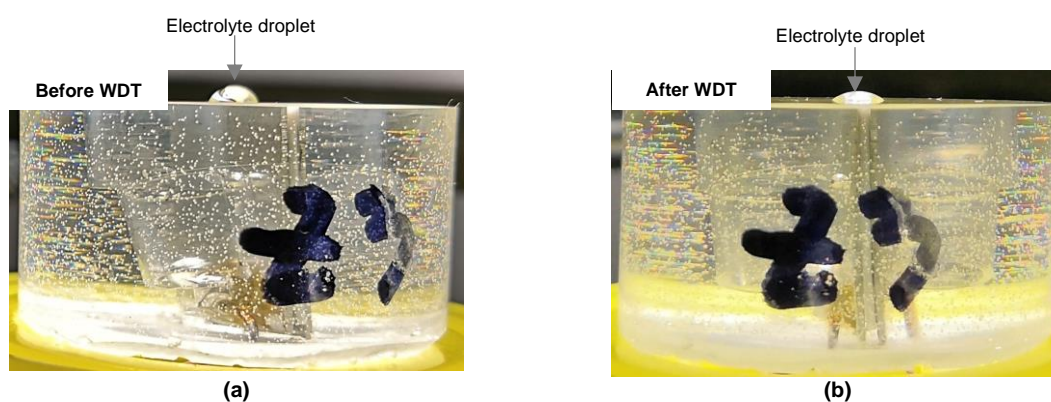

**Supplementary Figure S4.** Front view of a typical test sample showing the thickness of NaBr electrolyte droplet (a) before the WDT at 0 s and (b) after the WDT at 450 s.
